# Supplementary material
Source: PubMed Central journal article supplement (PMC7462031)
Supplement: Supp_Fig1.pdf [file Supp_Fig1.pdf]

# Supplementary Data

Created with SnapGene®

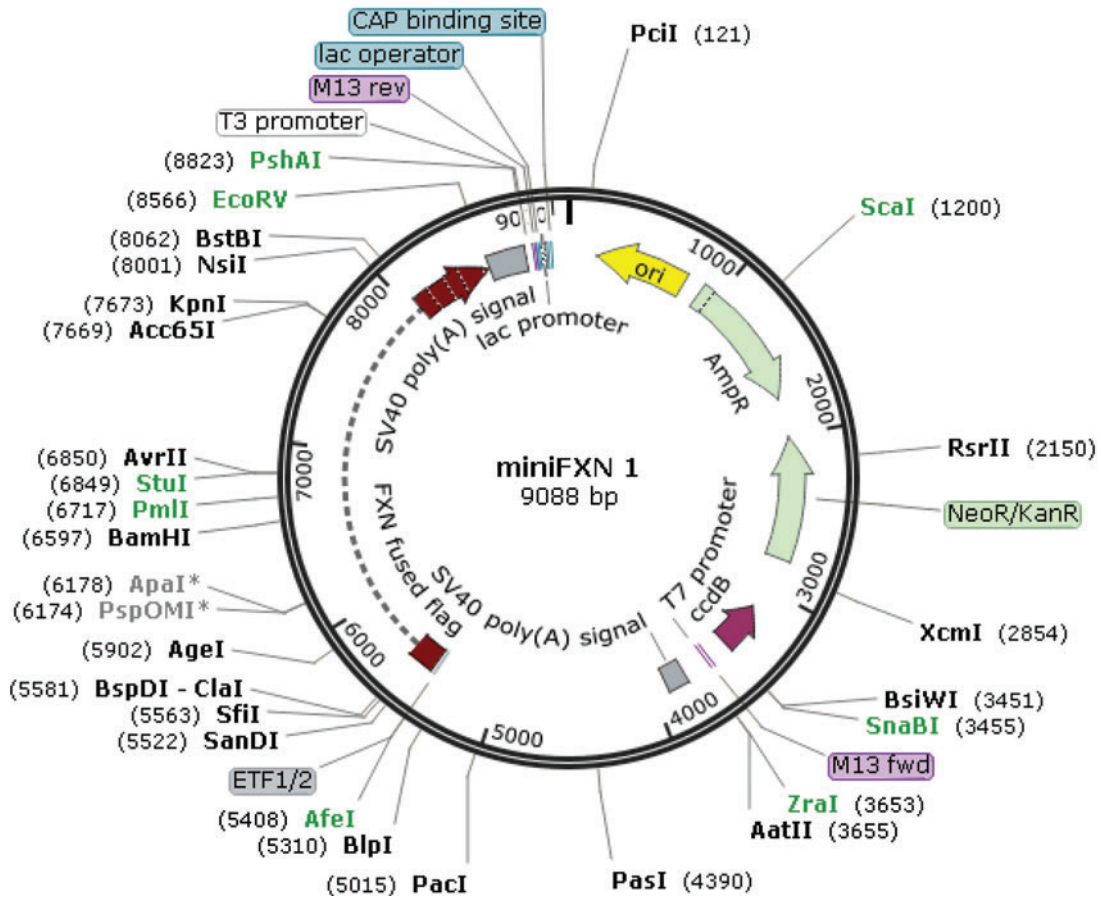

**Supplementary Figure S1.** Map and sequence of the miniFXN 1 construct.
